# Supplementary material for: Laser-induced graphene/gold nanoparticle hybrid sensor for enhanced electrochemical detection of paracetamol
Source: Royal Society of Chemistry journal article supplement (doi:10.1039/d4ay01627k), 2024-01-01
Supplement: d4ay01627k1.pdf [file d4ay01627k1.pdf]

## Supporting Information

### **Laser-Induced Graphene/Gold Nanoparticle Hybrid Sensor for Enhanced Electrochemical Detection of Paracetamol**

Wenbang Yu<sup>a\*</sup>, Xiaotian Xu<sup>b</sup>, Tian Cao<sup>b</sup>, Zihan Wei<sup>c</sup>, Jing Tang<sup>d\*</sup>, Min Zhang<sup>b\*</sup>

<sup>a</sup> Jinhua University of Vocational Technology, Jinhua 321000, China.

<sup>b</sup> School of Chemistry and Molecular Engineering, Shanghai Key Laboratory for Urban Ecological Processes and Eco-Restoration, East China Normal University, 500 Dongchuan Road, Shanghai 200241, China.

<sup>c</sup> Shanghai Rongxiang Biotechnology Co., Ltd, Shanghai 201100, China.

<sup>d</sup> The Obstetrics & Gynecology Hospital of Fudan University, 419 Fangxie Road, Shanghai, 200011, China.

## Reagents and instruments

Paracetamol (Acetaminophen, AP), potassium ferricyanide ( $K_3[Fe(CN)_6]$ ), and potassium ferrocyanide ( $K_4[Fe(CN)_6]$ ) were purchased from Damas-beta (Shanghai, China). The polyimide film (25  $\mu\text{m}$ , DuPont, USA), silver/silver chloride ink (EN-06B8, Enson, China), silver ink (JLL-20, JuLong, China), polyethylene terephthalate (PET) film (10  $\mu\text{m}$ ), screen-printed carbon electrodes (SPCE), and screen-printed gold electrodes (SPAEC) were all bought on Taobao. The glassy carbon electrode (GCE) was acquired from ChenHua Instrument Co. Ltd. Phosphate buffered saline (10 mM KCl, pH = 7.4), chloroauric acid trihydrate ( $HAuCl_4 \cdot 3H_2O$ ), catechol (CC), resorcinol (RC), hydroquinone (HQ), ethanol, and acetone were purchased from Sigma Aldrich, China. Dopamine (DA), L-ascorbic acid (AA), and urea (UA) were sourced from Macklin, Shanghai, China. All the reagents mentioned above are of analytical grade. Ultrapure water ( $\geq 18 \text{ M}\Omega \cdot \text{cm}$ ) was produced by the Hitachi water purification system (Shanghai, China).

The scanning electron microscope (SEM) images were captured using a Zeiss Gemini SEM 300. Powder X-ray diffraction (PXRD) was performed on a SmartLab SE diffractometer (Rigaku, Tokyo, Japan) with Cu  $K\alpha$  radiation. Raman spectra were collected using a Renishaw inVia Raman microscope. X-ray photoelectron spectroscopy (XPS) was conducted on a Thermo Fisher ESCALAB 250Xi using an Al  $K\alpha$  laser (Thermo Fisher Scientific, USA). Contact angle images were obtained using a Theta Flex (BioLin, Sweden).

## Preparation of AuNPs/LIG electrode

First, a 10.6  $\mu\text{m}$   $\text{CO}_2$  laser was used to mark out the working electrode area of the three-electrode system on a 100  $\mu\text{m}$  PI substrate. Then, 100 mM  $\text{HAuCl}_4$  solution was drop-cast onto the obtained LIG working electrode at a loading volume of 10  $\mu\text{L}$ . After the chloroauric acid precursor solution dried at room temperature, a second laser treatment was conducted under the same conditions as the first to obtain an AuNPs/LIG composite nanoelectrode. The settings for both laser treatments were: laser power of 2.5 W, speed of 150  $\text{mm}\cdot\text{s}^{-1}$ , line spacing of 0.08 mm, and the laser mode was vector mode. Once the laser-marked electrode was prepared, screen printing technology was utilized to quickly print conductive silver paste and silver/silver chloride paste, which served as the reference electrode and connection wires in the three-electrode system, through pre-designed screen meshes and a scraper, followed by curing in an oven at 80°C for 5 minutes. Finally, a layer of PET film was applied over the AuNPs/LIG electrode as a passivation layer to isolate the working electrode area. The pattern of the three-electrode system was pre-designed using CAD software.

### **Electrochemical detection using AuNPs/LIG electrodes**

To investigate the preparation conditions of AuNPs/LIG and the effect of external strain on electrochemical behavior, cyclic voltammetry (CV) measurements were conducted within a voltage range of -0.2 V to +0.6 V in a 0.1 M KCl solution containing 5.0 mM  $\text{K}_3[\text{Fe}(\text{CN})_6]^{3-/4-}$ . In a 0.1 M PBS solution with a pH of 7, differential pulse voltammetry (DPV) was employed at a scan rate of 0.05 V/s to detect the electroactivity of acetaminophen within the range of -0.2V to +0.6V.

## Actual sample analysis

Tylenol brand phenacetin-containing tablets were purchased from a pharmacy, and one tablet was ground into powder. According to the acetaminophen content indicated in the instruction manual, it was prepared into a standard concentration for testing. Tap water was directly sampled from the laboratory's water pipe. After filtering out physical impurities with a 0.45  $\mu\text{m}$  filter, the tap water samples were diluted and adjusted to pH using a 0.1 M PBS solution (pH=7.0) at a ratio of 1:1 (v:v). The standard addition method was used to analyze acetaminophen in the tap water samples. The formula for determining the recovery rate is:

$$\text{Recovery Rate (\%)} = \text{Test Concentration} / \text{Added Concentration} \times 100\%.$$

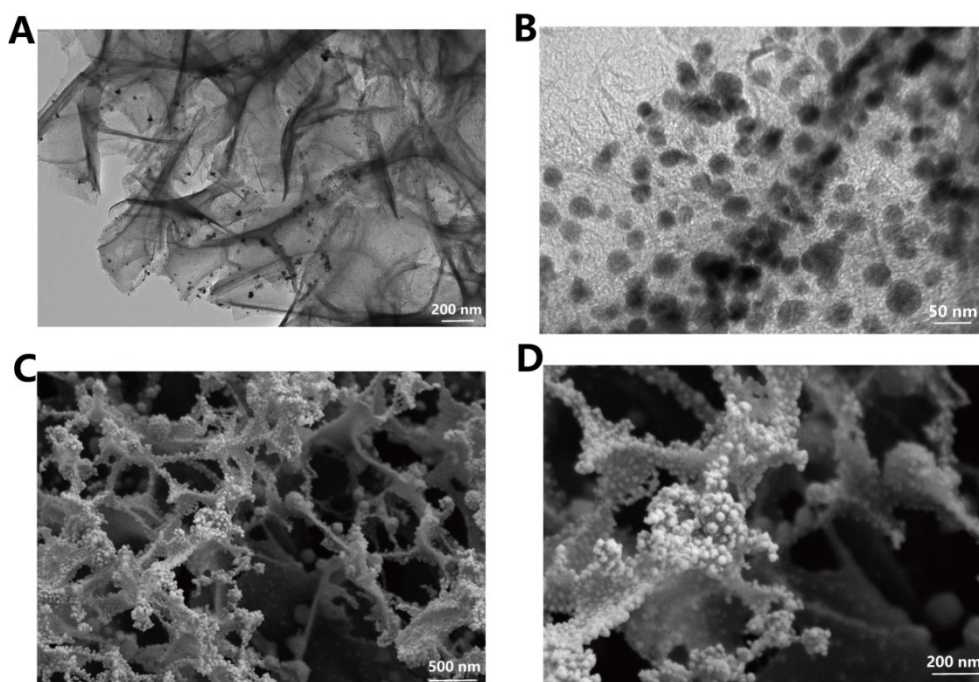

**Fig. S1** Characterization of AuNPs/LIG electrodes: (A, B) TEM image; (C, D) SEM images.

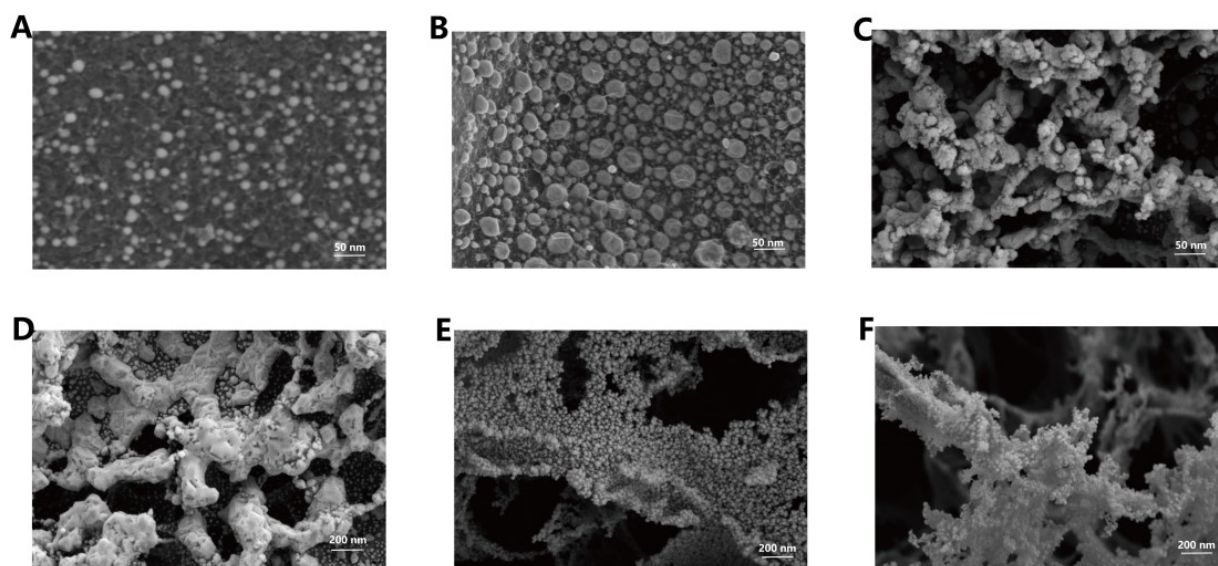

**Fig. S2** SEM images of AuNPs/LIG fabricated with different laser parameters: (A) 2.0 W; (B) 2.5 W; (C) 3.0 W. SEM images of secondary laser engraving at different speeds: (D) 100 mm·s<sup>-1</sup>; (E) 150 mm·s<sup>-1</sup>; (F) 200 mm·s<sup>-1</sup>.

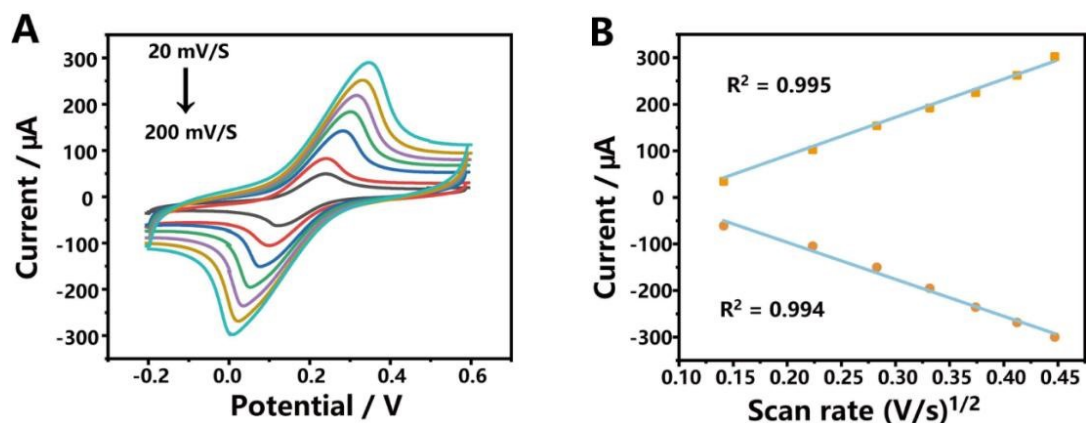

**Fig. S3** (A) Cyclic voltammograms (CVs) of the AuNPs/LIG electrode in a solution containing 0.1 mmol/L KCl and 5 mM  $[\text{Fe}(\text{CN})_6]^{3-/4-}$  at different scan rates: 20, 50, 80, 110, 140, 170, 200 mV/s; (B) Plot of peak current versus the square root of scan rate.

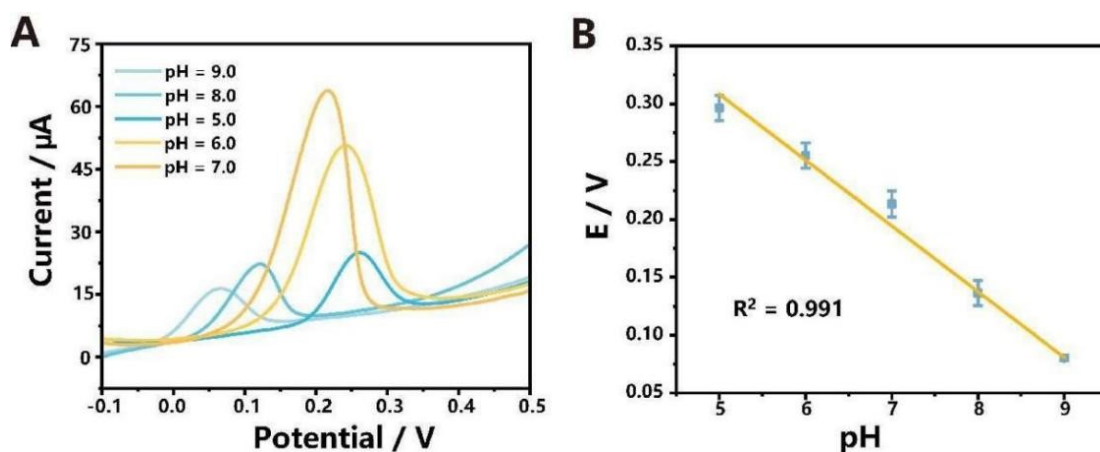

**Fig. S4** (A) Cyclic voltammograms (CVs) of the AuNPs/LIG electrode in a PBS buffer solution (pH=7.0) containing 0.1 mmol/L paracetamol at different scan rates: 20, 50, 80, 110, 140, 170, 200 mV/s; (B) Plot of pH versus potential.

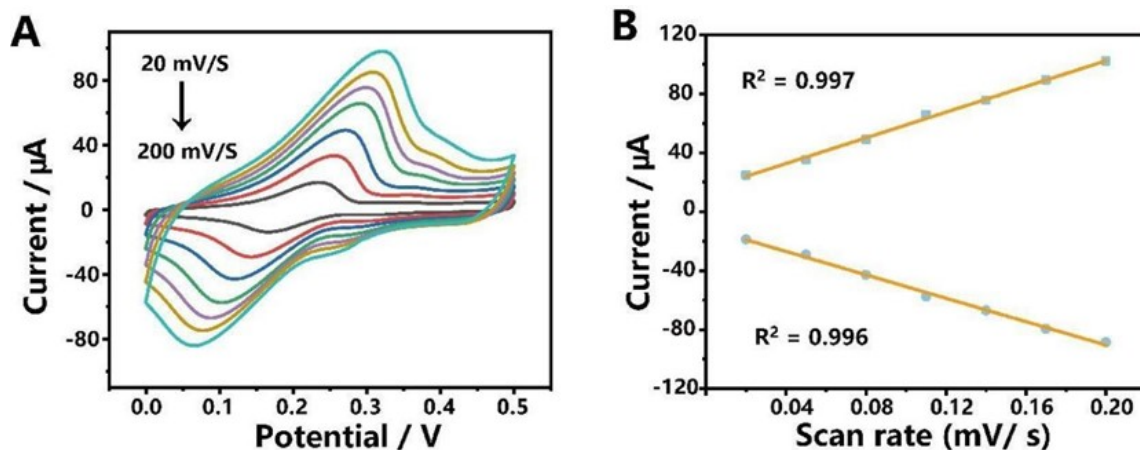

**Fig. S5** (A) Cyclic voltammograms (CVs) of the AuNPs/LIG electrochemical sensor in a PBS buffer solution (0.01 mol/L, pH=7.0) containing 1 mmol/L paracetamol at different scan rates: 20, 50, 80, 110, 140, 170, 200 mV/s; (B) Plot of peak current versus scan rate.

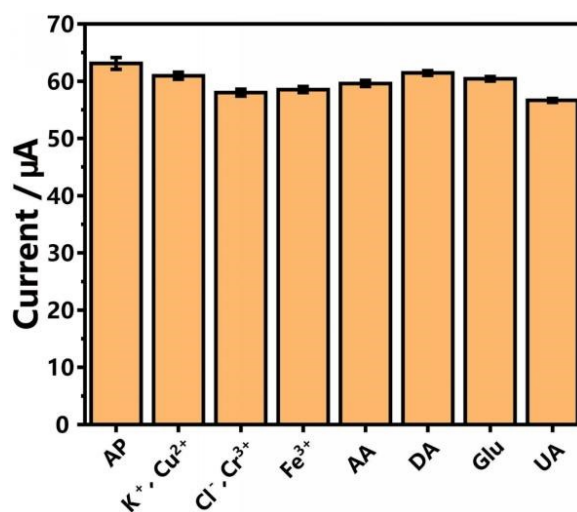

**Fig. S6** Effect of 10 mM organic or inorganic ions on the current value of AuNPs/LIG response to paracetamol. AP- paracetamol; AA- Ascorbic acid; DA- Dopamine; UA- Uric acid.

**Table S1** Comparison between reported methods and our method for detecting paracetamol.

| Electrode                               | Detection object | Linear range              | Detection limit | Application scenario | Reference  |
|-----------------------------------------|------------------|---------------------------|-----------------|----------------------|------------|
| S-CTFs@NiCo <sub>2</sub> O <sub>4</sub> | PA               | 2 ~ 360 $\mu$ M           | 0.18 $\mu$ M    | Actual water sample  | [12]       |
|                                         | 4-PA             |                           | 0.35 $\mu$ M    |                      |            |
| NH <sub>2</sub> -UiO-66/WC              | PA               | 1 $\mu$ M ~ 150 $\mu$ M   | 0.17 $\mu$ M    | Actual water sample  | [20]       |
|                                         | PAP              |                           | 0.35 $\mu$ M    |                      |            |
| GMA                                     | PA               | 0.1 $\mu$ M ~ 150 $\mu$ M | 0.057 $\mu$ M   | tablet               | [41]       |
| N-GSEC                                  | PA               | 0.1 ~ 250 $\mu$ M         | 0.01 $\mu$ M    | -                    | [15]       |
|                                         | 4-PA             |                           | 0.025 $\mu$ M   |                      |            |
| AuNPs/LIG                               | PA               | 0.1 $\mu$ M ~ 100 $\mu$ M | 0.065 $\mu$ M   | Tab water and tablet | This study |

**Table S2** Comparison with other laser synthesis methods.

| Electrode  | Detection object              | Linear range      | Detection limit  | Application scenario   | Reference |
|------------|-------------------------------|-------------------|------------------|------------------------|-----------|
| LIG        | Paraquat                      | 0.5 - 35 $\mu$ M  | 0.54 $\mu$ M     | Actual water sample    | [42]      |
| LIG/PtNPs  | glucose                       | 300 nM - 2.1 mM   | 4.622 $\mu$ A/mM | Sweat                  | [43]      |
| LIG/Ag NPs | H <sub>2</sub> O <sub>2</sub> | 0.1 - 10 mM       | 7.9 $\mu$ M      | Whole and skimmed milk | [44]      |
| Co@3D NPC  | clozapinealben                | 0.15 - 20 $\mu$ M | 2.8 nM           | Soothing tea           | [45]      |



|           |        |                           |               |                      |            |
|-----------|--------|---------------------------|---------------|----------------------|------------|
|           | dazole | 0.1 - 7 $\mu$ M           | 2.5 nM        | and pure milk        |            |
| AuNPs/LIG | PA     | 0.1 $\mu$ M - 100 $\mu$ M | 0.065 $\mu$ M | Tab water and tablet | This study |

**Table S3.** Detection of paracetamol in actual samples

| Sample    | Spiked ( $\mu$ M) | Found ( $\mu$ M) | HPLC ( $\mu$ M) | Recovery rate (%) |
|-----------|-------------------|------------------|-----------------|-------------------|
| Tablet    | 10                | 10.68            | 12.78           | 106.8%            |
|           | 20                | 20.12            | 22.89           | 100.6%            |
|           | 50                | 52.33            | 52.27           | 104.66%           |
|           | 80                | 82.16            | 81.58           | 102.7%            |
| Tap water | 10                | 9.78             | 10.77           | 97.8%             |
|           | 20                | 19.25            | 22.17           | 96.25%            |
|           | 50                | 48.76            | 49.59           | 97.52%            |
|           | 80                | 78.63            | 78.32           | 98.29%            |
